# Supplementary material for: A dynamical process-based model AMmonia–CLIMate v1.0 (AMCLIM v1.0) for quantifying global agricultural ammonia emissions – Part 1: Land module for simulating emissions from synthetic fertilizer use
Source: Copernicus journal article supplement (doi:10.5194/egusphere-2024-962), 2024-04-09
Supplement: Supplementary file 1 [file egusphere-2024-962-supplement.pdf]

# Supplement

Jize Jiang<sup>1,a</sup>, David S. Stevenson<sup>1</sup>, and Mark A. Sutton<sup>2</sup>

<sup>1</sup>School of GeoSciences, The University of Edinburgh, Crew Building, Alexander Crum Brown Road, Edinburgh, EH9 3FF, UK

5 <sup>2</sup>UK Centre for Ecology and Hydrology, Edinburgh, Bush Estate, Midlothian, Penicuik, EH26 0QB, UK

<sup>a</sup>now at: Institute of Agricultural Sciences/Institute of Biogeochemistry and Pollutant Dynamics, ETH Zurich, 8092 Zurich, Switzerland

*Correspondence to:* Jize Jiang (jize.jiang@usys.ethz.ch/ jize.jiang@ed.ac.uk)

## S1 Budgets of TAN and other nitrogen species in soil layers for simulating chemical fertilizer applications

10 The budget of TAN in each soil layer ( $M_{\text{TAN},L}$ , g N m<sup>-2</sup>, given in per unit area; all masses have units of g m<sup>-2</sup> if not specifically explained) varies as processes can be different. For the top soil layer (0-2 cm), the time-dependent TAN pool is expressed as:

$$\frac{dM_{\text{TAN},L1}}{dt} = I_{\text{TAN}} + F_{\text{TAN}} - F_{\text{NH}_3} - F_{\text{N runoff}} - F_{\text{diffusion}} - F_{\text{drainage}} - F_{\text{nitrif}}. \quad (\text{SM1})$$

For soil layer 2 and 3:

15 
$$\frac{dM_{\text{TAN},L2,3}}{dt} = I_{\text{TAN}} + F_{\text{TAN}} - F_{\text{diffusion}} - F_{\text{drainage or leaching}} - F_{\text{nitrif}} - F_{\text{uptake}}. \quad (\text{SM2})$$

The bottom soil layer acts as a boundary layer of the deeper soils where dissolved nitrogen is lost from the soil column through leaching and diffusion, where the pools and concentrations of nitrogen species are set to 0. The bottom soil layer has a thickness of 14 cm in order to define the transport distance for diffusive fluxes and also to be consistent with the layering of the reanalysis soil data used in the model.

20 AMCLIM also simulates urea and nitrate in soils. In the top soil layer, the time-dependent urea and nitrate pools are expressed as:

$$\frac{dM_{\text{urea},L1}}{dt} = I_{\text{urea}} - K_{\text{Urea}}M_{\text{Urea}} - F_{\text{urea runoff}} - F_{\text{diffusion}} - F_{\text{drainage}}, \quad (\text{SM3})$$

$$\frac{dM_{\text{nitrate},L1}}{dt} = F_{\text{nitrif}} - F_{\text{nitrate runoff}} - F_{\text{diffusion}} - F_{\text{drainage}}. \quad (\text{SM4})$$

For soil layer 2 and 3:

25 
$$\frac{dM_{\text{urea},L2,3}}{dt} = I_{\text{urea}} - K_{\text{Urea}}M_{\text{Urea}} - F_{\text{diffusion}} - F_{\text{drainage}}, \quad (\text{SM5})$$

$$\frac{dM_{\text{nitrate},L2,3}}{dt} = F_{\text{nitrif}} - F_{\text{diffusion}} - F_{\text{drainage}} - F_{\text{uptake}}. \quad (\text{SM6})$$

The fluxes have been explained in Sections 2.2.1 ( $I_{\text{TAN}}$  – direct input of TAN species, such as ammonium or ammonia;  $I_{\text{TAN}}$  – direct input of urea from fertilizer;  $F_{\text{TAN}}$  – TAN production through urea or UA hydrolysis and decomposition of organic N;  $F_{\text{NH}_3}$  – flux of NH<sub>3</sub> volatilization;  $F_{\text{TAN/urea/nitrate runoff}}$  – flux of surface TAN, urea or nitrate runoff;  $F_{\text{diffusion}}$  – diffusive fluxes;

30  $F_{\text{drainage}}$  – flux of drainage;  $F_{\text{leaching}}$  – flux of leaching;  $F_{\text{nitrif}}$  – nitrification;  $F_{\text{uptake}}$  – flux of N uptake by plants/crops; all N fluxes/flows have units of  $\text{g N m}^{-2} \text{s}^{-1}$  if not specifically explained).

## S2 Adsorption coefficient of $\text{NH}_4^+$ on solid particles

Soils can adsorb  $\text{NH}_4^+$  due to cation exchange, and the adsorption of  $\text{NH}_4^+$  on soil solids varies between different soils (Buss et al., 2004). The cation exchange capacity of soils is difficult to simulate especially on a global scale. Therefore, the partitioning coefficient  $K_d$  used to determine the  $\text{NH}_4^+$  adsorption is derived from an empirical relationship depending on the fractional soil clay content ( $f_{\text{clay}}$ ) to which the soil cation exchange capacity is related (Dutta et al., 2016). The equation is expressed as:

$$K_d = 0.5(7.2733f_{\text{clay}}^3 - 11.22f_{\text{clay}}^2) + 5.7198f_{\text{clay}} + 0.0263. \quad (\text{SM7})$$

## 40 S3 Nitrification process

Nitrification is considered to take place in soils and solid manure systems exposed to oxygen. In contrast, for liquid systems, such as slurry system or lagoon, nitrification is considered to be absent or negligible due to the high water content that reduces oxygen availability.

A first-order reaction is used to determine nitrification as shown in Eq. (12). The optimum nitrification rate ( $K_{K_{\text{nitrif,opt}}}$ ) is set to be 10 % per day, and the nitrification rate  $K_{\text{nitrif}}$  is affected by temperature, water content, and pH as shown in Eq. (12) (Parton et al., 1996, 2001). The dependence of each factor is expressed by the following equations. The temperature dependence is taken from Stange and Neue, (2009):

$$k_{\text{nitrif,T}} = \left( \frac{t_{\text{max}} - T_{\text{gnd}}}{t_{\text{max}} - t_{\text{opt}}} \right)^{a_{\Sigma}} \exp \left( a_{\Sigma} \left( \frac{t_{\text{max}} - T_{\text{gnd}}}{t_{\text{max}} - t_{\text{opt}}} \right) \right), \quad (\text{SM8})$$

where  $T_{\text{gnd}}$  is the ground temperature. The maximum temperature ( $t_{\text{max}}$ ) and optimum temperature ( $t_{\text{opt}}$ ) for microbial activity is 313 K and 301 K, respectively.  $a_{\Sigma}$  is an empirical factor that equals to 2.4 for manure; optimum temperature is 303 K and  $a_{\Sigma}$  is 1.8 for synthetic fertilizer (Stange and Neue, 2009).

The water content and pH dependence are taken from the empirical function of Patron et al. (1996)

$$k_{\text{nitrif,WFPS}} = \left( \frac{\text{WFPS} - b}{a - b} \right)^d \cdot \left( \frac{b - a}{a - c} \right)^d \left( \frac{\text{WFPS} - c}{a - c} \right)^d, \quad (\text{SM9})$$

where  $\text{WFPS}$  is the water-filled porosity of soil and is set to 1.0 for solid manure storage. Coefficients a, b, c and d are equal to 0.60, 1.27, 0.0012 and 2.84, respectively (Parton et al., 1996).

$$k_{\text{nitrif,pH}} = 0.56 + \frac{\tan^{-1}(0.45\pi(\text{pH}-5))}{\pi}. \quad (\text{SM10})$$

Nitrification is mainly found to take place in soils at pH ranging between 5.5 to 10, with the optimum pH at around 8.5, and the process mainly ceases in soils under natural pH less than 5.0 (Parton et al., 1996). In AMCLIM-Land, the pH dependence for nitrification rate is a trigonometric function from Parton et al. (1996).

60

#### S4 Nitrogen and water uptake by crops

Nitrogen uptake by plants in AMCLIM-Land is assumed to take place in soil layers 2 and 3, which can be calculated by Eq. (13) in Sect.2.2.1. Uptake is not treated in the top soil layer (layer 1), which focuses on the ammonia–atmosphere exchange interface (Sect.2.2.1). AMCLIM–Land uses a root uptake scheme derived from several studies (Riedo et al., 1998; Thornley, 1991; Thornley and Cannell, 1992; Thornley and Verberne, 1989). Crops can take up both ammonium and nitrate from the soils, together termed as  $M_{\text{Neff}}$ , as expressed by the follows:

$$M_{\text{Neff}} = M_{\text{NH}_4^+} + a_{\text{plant}} M_{\text{NO}_3^-}, \quad (\text{SM11})$$

where  $M_{\text{NH}_4^+}$  and  $M_{\text{NO}_3^-}$  are ammonium and nitrate pools in soils. A dimensionless parameter  $a_{\text{plant}}$  varies between 0.5 to 1.0 depending upon temperature, and is calculated by the following equation:

$$a_{\text{plant}} = a_{20} - (a_{20} - a_{10}) \frac{(20 - T_{\text{gnd}})}{(20 - 10)}, \quad (\text{SM12})$$

where  $a_{20}$  and  $a_{10}$  are reference values at 20 and 10 °C, respectively (Thornley and Verberne, 1989). However, this equation is only applicable between 10 and 20 °C so is extrapolated to a broader temperature range as the following equation:

$$a_{\text{plant}} = 0.25 e^{0.0693 T_{\text{gnd}}}. \quad (\text{SM13})$$

The integrated root activity parameter  $\alpha_{\text{root}}$  is determined by the following equation:

$$\alpha_{\text{root}} = \sigma_{\text{N}} \sum_{i=1}^4 v_i W_{r,i}, \quad (\text{SM14})$$

where  $W_{r,i}$  (g m<sup>-2</sup>) is root structural dry matter and  $v_i$  is the corresponding root activity weighting parameter (Thornley and Verberne, 1989).  $\sigma_{\text{N}}$  (g N g<sup>-1</sup> d<sup>-1</sup>) is the temperature-dependent root activity parameter for nitrogen, which is calculated by the following equation:

$$\sigma_{\text{N}} = \sigma_{20} f_T, \quad (\text{SM15})$$

80 where  $\sigma_{20}$  is a reference value that is set at 0.05 at 20 °C (Thornley and Verberne, 1989), and the temperature dependence ( $f_T$ ) is identical as Eq. (SM13).

The combined response factor  $J_{\text{C,N}}$  for plant uptake to substrate carbon and nitrogen from the soil is calculated by the following equation:

$$J_{\text{C,N}} = 1 + \frac{K_{\text{CUN}}}{C} \left( 1 + \frac{N}{J_{\text{NUN}}} \right), \quad (\text{SM16})$$

85 where  $K_{\text{CUN}}$  (0.05[C]) and  $J_{\text{NUN}}$  (0.005[N]) are constants. In this equation,  $C$  (g C m<sup>-2</sup>) and  $N$  (g N m<sup>-2</sup>) are substrate concentration of carbon and nitrogen (Riedo et al., 1998; Thornley, 1991; Thornley and Cannell, 1992; Thornley and

Verberne, 1989), respectively. As the model does not simulate plant dynamics,  $C$  and  $N$  are represented by fixed values of 40 and 4, respectively (Riedo et al., 1998).

Combining these terms, plant uptake of N ( $F_{\text{uptake}}$ ) can be expressed as (Riedo et al., 1998; Thornley, 1991; Thornley and  
90 Cannell, 1992):

$$F_{\text{uptake}} = \sigma_N \sum_{i=1}^4 v_i W_{r,i} \frac{M_{\text{NH}_4^+} + a_{\text{plant,nit}} M_{\text{NO}_3^-}}{M_{\text{NH}_4^+} + a_{\text{plant,nit}} M_{\text{NO}_3^-} + K_{\text{Neff}} \left(1 + \frac{K_C}{C} \left(1 + \frac{N}{K_N}\right)\right)} \quad (\text{SM17})$$

where  $K_{\text{Neff}}$  is a root activity parameter, set at a constant of 5 g N m<sup>-2</sup> (Riedo et al., 1998). There are four components in  $W_{r,i}$  that represent the structural dry matter of roots at different stages (i.e., four age categories of roots from young to mature). Mature roots have larger  $W_{r,i}$  values. The root activity weighting parameter  $v_i$  changes as plants grow, i.e., larger values refer  
95 to more mature roots of the plant. AMCLIM-Land uses a set of empirical values to represent  $v_i$ , which describes the status of roots at six growing stages (Table A1). The six growing stages are evenly distributed during the growing season of a crop.

**Table S1. Root activity weighting parameters at different crop growing stage.**

|       | Stage 1 | Stage 2 | Stage 3 | Stage 4 | Stage 5 | Stage 6 |
|-------|---------|---------|---------|---------|---------|---------|
| $v_1$ | 0.1     | 1.0     | 1.0     | 0.5     | 0.25    | 0.1     |
| $v_2$ | 0.1     | 0.5     | 1.0     | 1.0     | 0.5     | 0.25    |
| $v_3$ | 0.1     | 0.25    | 0.5     | 1.0     | 1.0     | 1.0     |
| $v_4$ | 0.1     | 0.1     | 0.25    | 0.5     | 1.0     | 1.0     |

100 Water uptake by crops is represented by a simple empirical equation that is related to the soil water content (Dardanelli et al., 2004), which is expressed as follows:

$$W_{\text{uptake}} = K_{\text{uptake}}(\theta - \theta_{\text{wp}}), \quad (\text{SM18})$$

where  $K_{\text{uptake}}$  is an empirical coefficient that equals to 0.096 d<sup>-1</sup> (Dardanelli et al., 2004).

### S5 Calculation of soil resistances

105 Aqueous and gaseous diffusion of nitrogen species in soils are constrained by soil resistances. The soil resistance is determined by the following equation:

$$R_{\text{soil,aq/gas}} = \frac{\Delta z_{\text{soil}}}{\xi_{\text{aq/gas}}(\theta) D_{\text{NH}_4^+/\text{NH}_3}^{\text{aq/gas}}}, \quad (\text{SM19})$$

where  $\Delta z_{\text{soil}}$  (m) is the transport distance in soils, which is treated as the distance between the mid-points of each soil layer.

The molecular diffusivity ( $D_{\text{NH}_4^+/\text{NH}_3}^{\text{aq/gas}}$ , m<sup>2</sup> s<sup>-1</sup>) is multiplied by a soil tortuosity factor,  $\xi_{\text{aq/gas}}(\theta)$ , to adjust for the soil water

110 content as well as the porosity (Millington and Quirk, 1961; M3ring et al., 2016; Vira et al., 2020)). The molecular diffusivity and tortuosity factor are calculated by the following equations:

$$D_{\text{NH}_4/\text{NH}_3}^{\text{aq/gas}} = \begin{cases} 9.8 \times 10^{-10} \cdot 1.03^{T-273.15}, & \text{for } \text{NH}_4^+ \\ \frac{10^{-7} \cdot T^{1.75} (1/m_{\text{air}} + 1/m_{\text{NH}_3})^{0.5}}{p[(\sum_{\text{air}} v_i)^{1/3} + (\sum_{\text{NH}_3} v_i)^{1/3}]^2}, & \text{for } \text{NH}_3, \end{cases} \quad (\text{SM20})$$

115 where  $m_{\text{air}}$  and  $m_{\text{NH}_3}$  are molecular weight of air and  $\text{NH}_3$ , respectively, using values of 29 g mol<sup>-1</sup> and 17 g mol<sup>-1</sup>.  $\sum_{\text{air}} v_i$  (20.1) and  $\sum_{\text{NH}_3} v_i$  (14.9) are the atomic diffusion volumes for air and  $\text{NH}_3$  (Perry and Green, 2008), and  $p$  is pressure in the atmosphere.

$$\xi_{\text{aq/gas}}(\theta) = \begin{cases} \frac{(\theta - \theta_{\text{sat}})^{8.5}}{\theta_{\text{sat}}^{1.7}}, & \text{for gaseous diffusion} \\ \frac{\theta^{8.5}}{\theta_{\text{sat}}^{1.7}}, & \text{for aqueous diffusion} \end{cases}, \quad (\text{SM21})$$

where  $\theta_{\text{sat}}$  is soil water content at saturation. The tortuosity factors are calibrated by site simulations using AMCLIM under the conditions of the GRAMINAE field experiment (see Sect.2.3.1).

## 120 S6 Concentrations of nitrogen species at surface

Volatilization and runoff take place at the land surface, with these fluxes being primarily driven by nitrogen concentrations at the surface. To take into account the soil resistance and heterogeneity of the soil, the surface concentrations of nitrogen species are not calculated from dividing the mass of nitrogen in the soil layer by the volume (or the thickness over unit areas), but are solved by assuming that the upward diffusion (from the mid-point of the top soil layer to the surface) is equal  
125 to the volatilization and runoff, as expressed by Eq. (14). Therefore, Eq. (14) can be expanded as:

$$\frac{[\text{NH}_3(\text{g})]_{\text{srf}} - \chi_{\text{atm}}}{R_{\text{atm}}} + q_r \cdot [\text{TAN}(\text{aq})]_{\text{srf}} = \frac{[\text{TAN}(\text{aq})]_{\text{L1}} - [\text{TAN}(\text{aq})]_{\text{srf}}}{R_{\text{L1, aq}}} + \frac{[\text{NH}_3(\text{g})]_{\text{L1}} - [\text{NH}_3(\text{g})]_{\text{srf}}}{R_{\text{L1, gas}}}. \quad (\text{SM22})$$

The aqueous concentration of TAN at the surface can be solved as:

$$[\text{TAN}(\text{aq})]_{\text{srf}} = \frac{[\text{TAN}(\text{aq})]_{\text{L1}} \left( \frac{1}{R_{\text{L1, aq}}} + \frac{K_{\text{NH}_3}}{R_{\text{L1, gas}}} \right) + \frac{\chi_{\text{atm}}}{R_{\text{atm}}}}{q_r + \frac{1}{R_{\text{L1, aq}}} + K_{\text{NH}_3} \left( \frac{1}{R_{\text{L1, gas}}} + \frac{1}{R_{\text{atm}}} \right)}, \quad (\text{SM23})$$

and gaseous  $\text{NH}_3$  concentration at the surface can be solved subsequently (combined with Eq. (6)).

## 130 S7 Water drainage and percolation flux

Leaching of nitrogen from soils is determined by multiplying the aqueous concentrations of each species by the percolation flux of water. The percolation flux of water is the minimum value between the soil hydraulic conductivity and the drainage potential as shown in Eq. (17).

135 The soil hydraulic conductivity ( $K_s$ ) is related to the soil water content and the soil characteristics, which is approximated by the following equation (Li et al., 2019):

$$K_s = \frac{\theta}{\theta_{\text{sat}}} K_{\text{sat}}, \quad (\text{SM24})$$

$$\text{Where } K_{\text{sat}} = 2.2 \times 10^{-7} e^x, \quad (\text{SM25})$$

$$\text{given } x = 7.755 + 0.0352f_{\text{silt}} - 0.967BD_{\text{soil}}^2 - 0.000484f_{\text{clay}}^2 - 0.000322f_{\text{silt}}^2 + \frac{0.001}{f_{\text{silt}}} - \frac{0.748}{f_{\text{som}}} - 0.643\log_e f_{\text{silt}} - 0.01398BD_{\text{soil}} \cdot f_{\text{silt}} - 0.1673BD_{\text{soil}} \cdot f_{\text{som}}, \quad (\text{SM26})$$

140 and where  $K_{\text{sat}}$  ( $\text{m s}^{-1}$ ) is the soil hydraulic conductivity at saturation, which is dependent on the fractional soil silt ( $f_{\text{silt}}$ ) and clay content ( $f_{\text{clay}}$ ), bulk density of soil ( $BD_{\text{soil}}$ ,  $\text{g cm}^{-3}$ ) and fractional soil organic matter content ( $f_{\text{som}}$ ). The information of soil properties is from the RegridDED Harmonized World Soil Database (HWSD) v1.2 (FAO and IIASA, 2012; Wieder et al., 2014).

The drainage potential of a soil layer is calculated by the following equation:

$$145 D_{\text{pot}} = \max\left(0, \frac{\theta - \theta_{\text{fc}}}{z t_{\text{fc}}}\right), \quad (\text{SM27})$$

where  $t_{\text{fc}}$  is a reference time that soil water content reaches field capacity, which is set at 24 h. The field capacity of soil is determined from the bulk density (BD) (Li et al., 2019), as expressed by the following equation:

$$\theta_{\text{fc}} = 0.45 - 0.06BD_{\text{soil}}^2. \quad (\text{SM28})$$

## 150 S8 Fertilizer types from IFA and disaggregation of total nitrogen rates

AMCLIM-Land uses nitrogen chemical fertilizer consumption statistics at country-level from the International Fertilizer Association (IFA, 2023). Nitrogen fertilizer types provide in the IFA dataset includes direct  $\text{NH}_3$ , ammonium phosphate (AP), ammonium sulphate (AS), ammonium nitrate (AN), calcium ammonium nitrate (CAN), NK compound fertilizer (NK), NPK compound fertilizer (NPK), nitrogen solution, other NP fertilizer (other NP), urea, and other N straight fertilizer. It is assumed that NK compound fertilizer, NPK compound fertilizer and other NP fertilizer have the same amount of ammonium and nitrate on an equivalent basis. Nitrogen solution is assumed to contain 75 % of ammonium and 25 % nitrate (Vira et al., 2020). Other N straight fertilizer is treated as urea in AMCLIM-Land. The nitrogen in ammonium fertilizer, urea fertilizer and nitrate fertilizer can be calculated accordingly by the following equations:

$$Amm_{\text{N}} = \text{NH}_3 + AP_{\text{N}} + AS_{\text{N}} + 0.5(AN_{\text{N}} + CAN_{\text{N}} + NK + NPK + \text{other NP}) + 0.75N\text{solution}, \quad (\text{SM29})$$

$$160 Urea_{\text{N}} = \text{Urea} + \text{Other N straight}, \quad (\text{SM30})$$

$$Nit_{\text{N}} = 0.5(AN_{\text{N}} + CAN_{\text{N}} + NK + NPK + \text{other NP}) + 0.25N\text{solution}. \quad (\text{SM31})$$

The fraction of the major three nitrogen fertilizer groups (ammonium, urea and nitrate) is then calculated as follows:

$$f_{\text{fert}(j)} = \frac{M_{\text{fert}(j)}}{\sum_{j=1}^3 M_{\text{fert}(j)}}. \quad (\text{SM32})$$

165 The nitrogen application and fraction of three types of fertilizers as derived here for 2010 and 2018 are shown in Figure S1 and S2.

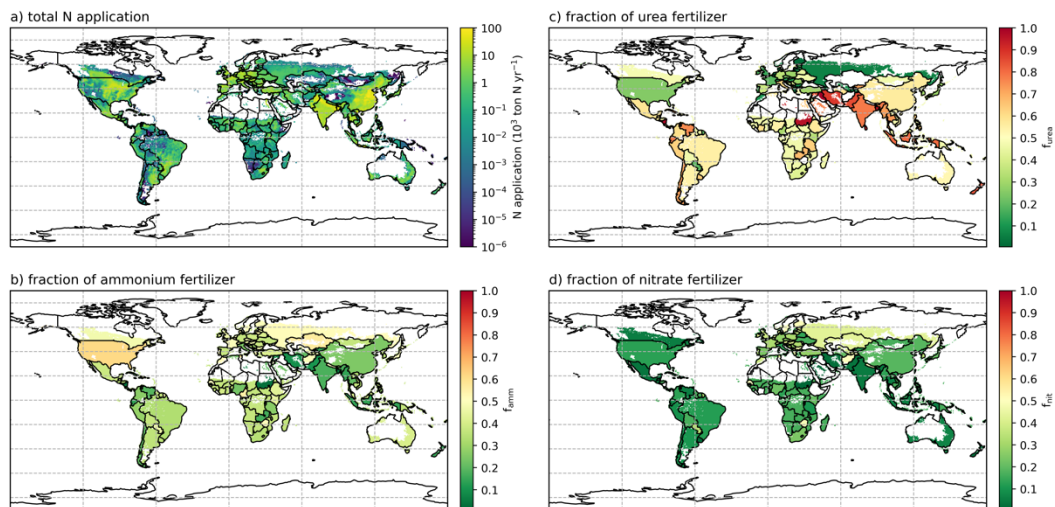

Figure S1. Fertilizer information of 2010. (a) Total nitrogen application rate. (b) Fraction of ammonium fertilizer. (c) Fraction of urea fertilizer. (d) Fraction of nitrate fertilizer.

170

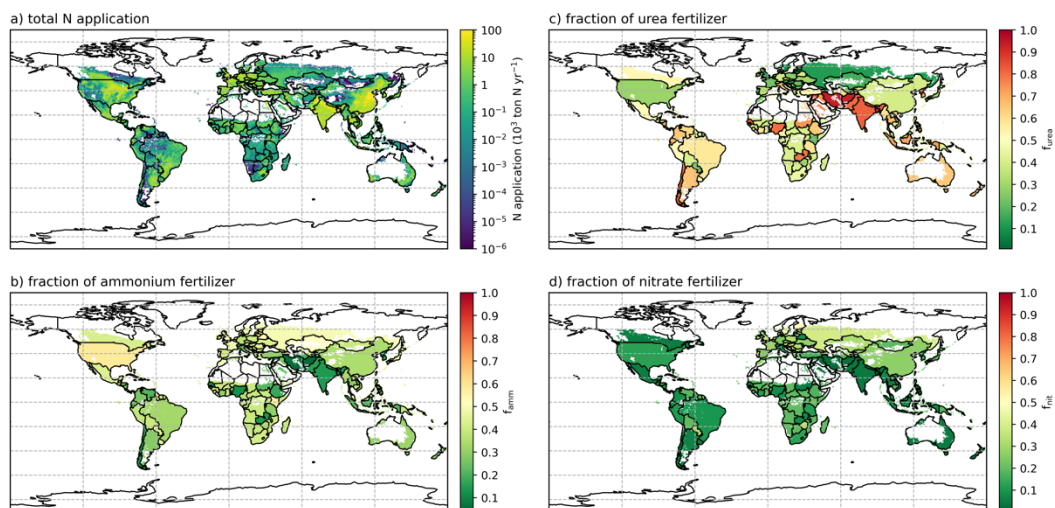

Figure S2. Same as Fig. S1, but for 2018.

## S9 Model diagnostic for the GRAMINAE site simulations

Figure S3 shows the modelled concentrations of N species in soils, as well as soil resistances and the NH<sub>3</sub> emissions. Figure S3 includes aqueous TAN and gaseous NH<sub>3</sub>; in this paragraph, TAN refers only to aqueous TAN only excluding solid exchangeable TAN.

The simulated concentrations of surface gaseous NH<sub>3</sub> are found to be much higher than the atmospheric NH<sub>3</sub> concentration at 1 m. Surface NH<sub>3</sub> concentrations range between 100 and 150  $\mu\text{g m}^{-3}$  on the first day, and between 50 to 100  $\mu\text{g m}^{-3}$  for the rest of the week, while the atmospheric concentrations of NH<sub>3</sub> are mostly within the range between 0 to 25  $\mu\text{g m}^{-3}$ . Two evident peaks in surface NH<sub>3</sub> concentrations that are larger than 200  $\mu\text{g m}^{-3}$  on 10 June can be seen. In contrast to the surface gaseous NH<sub>3</sub> concentrations, surface TAN concentration shows greater variation within a day, and its trends are opposite to the emissions, with higher values at night and lower values in the day. In the top soil layer (0–2 cm), TAN concentrations show a smooth declining curve from 1750  $\text{g m}^{-3}$  to less than 250  $\text{g m}^{-3}$  throughout the simulated period (Fig.S3c), indicating depletion of the TAN pool due to N losses through multiple pathways, which together act as a 1<sup>st</sup> order loss process. The simulated gaseous NH<sub>3</sub> concentrations of this soil layer show large variations due to the diurnal cycle in the temperature.

Soil resistances that constrain aqueous diffusion are found to be much larger than the resistance for gaseous diffusion of NH<sub>3</sub> (Fig.S3c). It is found that soil resistances are larger at night than day time due to low temperature, which slows down diffusion fluxes through the soil. When there are no runoff fluxes (i.e., no precipitation), upward soil diffusion fluxes are only balanced by the volatilization. As a solved variable by assuming an equilibrium state, surface TAN concentrations therefore tend to be high at night, leading to low concentration gradients. Meanwhile, since the resistances are large, upwards diffusive fluxes become smaller, which limits the surface fluxes (i.e., volatilization).

An averaged value of measured soil pH of ~6.3 was used for the simulations (Fig.S3d) based on field measurements at the site (Sutton et al., 2009a; Sutton et al., 2009b). As a result, the gamma value ( $([\text{NH}_4^+]/[\text{H}^+])$ ) of the top soil layer derived from the TAN concentration is shown as a smooth decaying curve. The modelled gamma values of the top soil layer were between 50000 and 25000, which are the same order of magnitude as the estimated measured values (exact measured values of gamma are not available; crude values are estimated from Fig.3 in Personne et al. (2009); Sutton et al. (2009b) by vision) and are comparable with the simulated gamma of the litter layer by Personne et al. (2009). Surface runoff was directly represented by the precipitation, and the modelled NH<sub>3</sub> emissions show sharp declines immediately after rain (e.g., 5 June evening) because the surface runoff is a competing pathway to the volatilization, which together deplete the TAN pool of the soil (Fig.3). The GRAMINAE measurements focused on NH<sub>3</sub> fluxes and did not include quantification of surface run-off, preventing site validation of this term. For example, the drivers for run off and leaching are similar, and would both lead to loss of ammonium (thereby reducing NH<sub>3</sub> emissions), especially for the soil in question with low cation exchange capacity site (Sutton et al., 2009a; Sutton et al., 2009b). For the entire simulated period of 5 to 15 June, AMCLIM-Land estimated that 10.4 % of the applied ammonium N is estimated to be lost due to NH<sub>3</sub> emissions to the air, 1.1 % is washed off by rainfall (runoff), 13.4 % is converted to NO<sub>3</sub><sup>-</sup> through nitrification, and the remaining 75.1 % of N is retained in the soil.



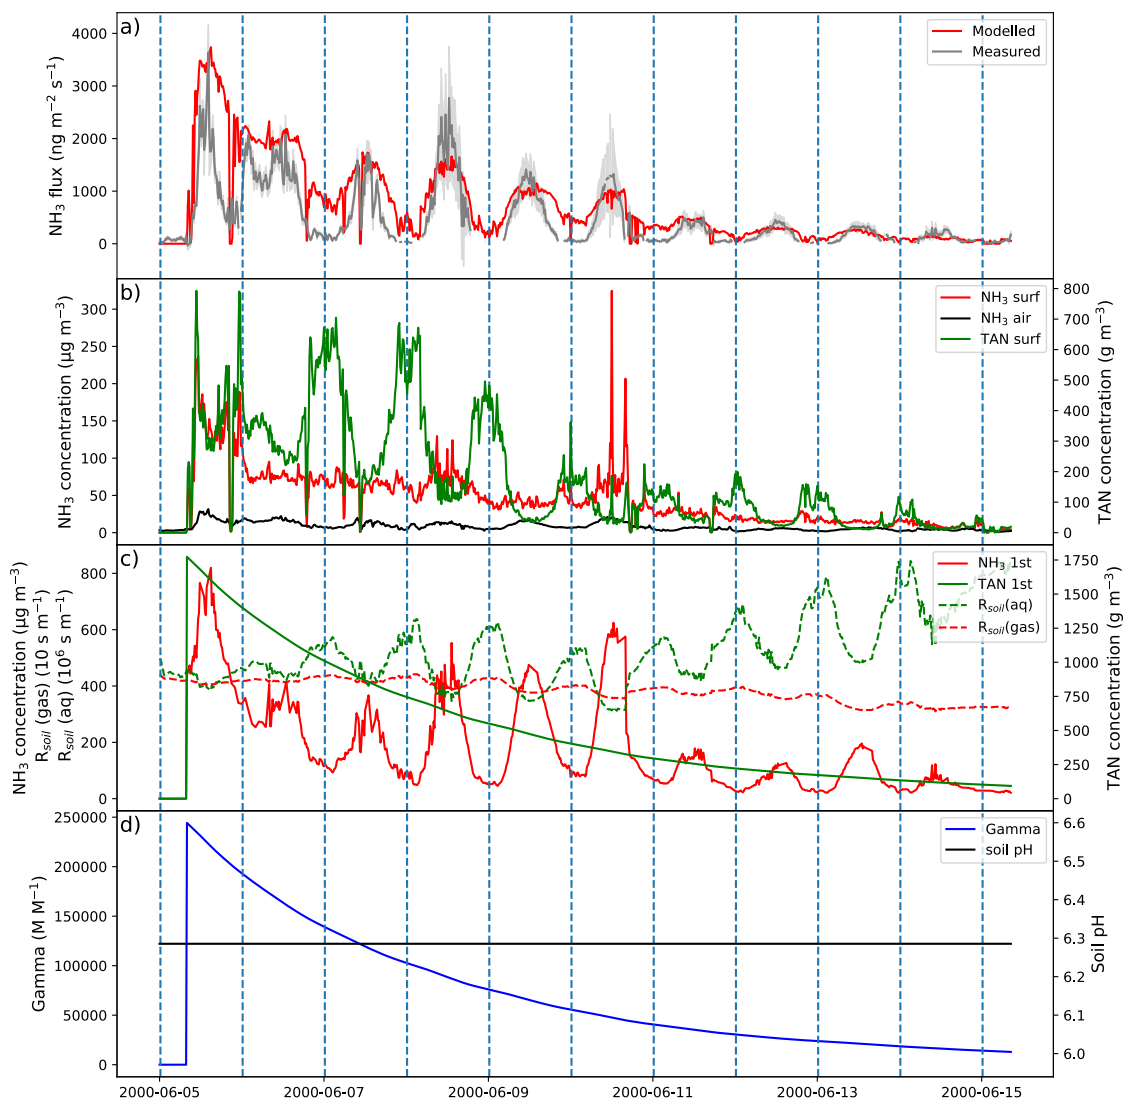

Figure S3. Modelled variables in the site simulations for  $\text{NH}_3$  emissions from a post-cutting grassland after fertilization in Braunschweig, Germany, from 5 June 2000 to 15 June 2000 (Sutton et al., 2009a; Sutton et al., 2009b) by AMCLIM-Land. (a) Modelled and measured  $\text{NH}_3$  emissions. (b) Solved concentrations of TAN and  $\text{NH}_3$  at the surface and the atmospheric concentration of  $\text{NH}_3$ . (c) Concentrations of TAN and  $\text{NH}_3$  of the 1<sup>st</sup> (top) soil layer, and soil resistances for aqueous and gaseous diffusions. (d) Gamma value ( $[\text{NH}_4^+]/[\text{H}^+]$ ) of the 1<sup>st</sup> (top) soil layer (0.3-2 cm depth) and soil pH used in AMCLIM-Land.

210

215

## References

- Buss, S. R., Herbert, A. W., Morgan, P., Thornton, S. F., and Smith, J. W. N.: A review of ammonium attenuation in soil and groundwater, *QJEGH*, 37, 347–359, <https://doi.org/10.1144/1470-9236/04-005>, 2004.
- 220 Dardanelli, J. L., Ritchie, J. T., Calmon, M., Andriani, J. M., and Collino, D. J.: An empirical model for root water uptake, *Field Crops Research*, 87, 59–71, <https://doi.org/10.1016/j.fcr.2003.09.008>, 2004.
- Dutta, B., Congreves, K. A., Smith, W. N., Grant, B. B., Rochette, P., Chantigny, M. H., and Desjardins, R. L.: Improving DNDC model to estimate ammonia loss from urea fertilizer application in temperate agroecosystems, *Nutr Cycl Agroecosyst*, 106, 275–292, <https://doi.org/10.1007/s10705-016-9804-z>, 2016.
- 225 Harmonized World Soil Database (version 1.2). <https://daac.ornl.gov/SOILS/guides/HWSD.html#datacharact>; last access: December 2022.
- International Fertilizer Association (2021). <https://www.fertilizer.org/> last access: November 2021.
- Li, S., Zheng, X., Zhang, W., Han, S., Deng, J., Wang, K., Wang, R., Yao, Z., and Liu, C.: Modeling ammonia volatilization following the application of synthetic fertilizers to cultivated uplands with calcareous soils using an improved DNDC biogeochemistry model, *Science of The Total Environment*, 660, 931–946, <https://doi.org/10.1016/j.scitotenv.2018.12.379>, 2019.
- 230 Millington, R. J. and Quirk, J. P.: Permeability of porous solids, *Trans. Faraday Soc.*, 57, 1200, <https://doi.org/10.1039/tf9615701200>, 1961.
- Móring, A., Vieno, M., Doherty, R. M., Laubach, J., Taghizadeh-Toosi, A., and Sutton, M. A.: A process-based model for ammonia emission from urine patches, GAG (Generation of Ammonia from Grazing): description and sensitivity analysis, *Biogeosciences*, 13, 1837–1861, <https://doi.org/10.5194/bg-13-1837-2016>, 2016.
- 235 Parton, W. J., Mosier, A. R., Ojima, D. S., Valentine, D. W., Schimel, D. S., Weier, K., and Kulmala, A. E.: Generalized model for  $N_2$  and  $N_2O$  production from nitrification and denitrification, *Global Biogeochem. Cycles*, 10, 401–412, <https://doi.org/10.1029/96GB01455>, 1996.
- 240 Parton, W. J., Holland, E. A., Del Grosso, S. J., Hartman, M. D., Martin, R. E., Mosier, A. R., Ojima, D. S., and Schimel, D. S.: Generalized model for  $NO_x$  and  $N_2O$  emissions from soils, *J. Geophys. Res.*, 106, 17403–17419, <https://doi.org/10.1029/2001JD900101>, 2001.
- Perry, R. H. and Green, D. W. (Eds.): *Perry's chemical engineers' handbook*, 8th ed., McGraw-Hill, New York, 1 pp., 2008.
- 245 Personne, E., Loubet, B., Herrmann, B., Mattsson, M., Schjoerring, J. K., Nemitz, E., Sutton, M. A., and Cellier, P.: SURFATM-NH3: a model combining the surface energy balance and bi-directional exchanges of ammonia applied at the field scale, 2009.
- Riedo, M., Grub, A., Rosset, M., and Fuhrer, J.: A pasture simulation model for dry matter production, and fluxes of carbon, nitrogen, water and energy, *Ecological Modelling*, 105, 141–183, [https://doi.org/10.1016/S0304-3800\(97\)00110-5](https://doi.org/10.1016/S0304-3800(97)00110-5), 1998.
- Stange, C. F. and Neue, H.-U.: Measuring and modelling seasonal variation of gross nitrification rates in response to long-term fertilisation, *Biogeosciences*, 6, 2181–2192, <https://doi.org/10.5194/bg-6-2181-2009>, 2009.

- 250 Sutton, M. A., Nemitz, E., Theobald, M. R., Milford, C., Dorsey, J. R., Gallagher, M. W., Hensen, A., Jongejan, P. A. C., Erisman, J. W., Mattsson, M., Schjoerring, J. K., Cellier, P., Loubet, B., Roche, R., Neftel, A., Hermann, B., Jones, S. K., Lehman, B. E., Horvath, L., Weidinger, T., Rajkai, K., Burkhardt, J., Lopmeier, F. J., and Daemmgen, U.: Dynamics of ammonia exchange with cut grassland: strategy and implementation of the GRAMINAE Integrated Experiment, 2009a.
- Sutton, M. A., Nemitz, E., Milford, C., Campbell, C., Erisman, J. W., Hensen, A., Cellier, P., David, M., Loubet, B.,  
255 Personne, E., Schjoerring, J. K., Mattsson, M., Dorsey, J. R., Gallagher, M. W., Horvath, L., Weidinger, T., Meszaros, R., Dammgen, U., Neftel, A., Herrmann, B., Lehman, B. E., Flechard, C., and Burkhardt, J.: Dynamics of ammonia exchange with cut grassland: synthesis of results and conclusions of the GRAMINAE Integrated Experiment, 2009b.
- Thornley, J. H. M.: A Transport-resistance Model of Forest Growth and Partitioning, *Annals of Botany*, 68, 211–226, <https://doi.org/10.1093/oxfordjournals.aob.a088246>, 1991.
- 260 Thornley, J. H. M. and Cannell, M. G. R.: Nitrogen Relations in a Forest Plantation—Soil Organic Matter Ecosystem Model, *Annals of Botany*, 70, 137–151, <https://doi.org/10.1093/oxfordjournals.aob.a088450>, 1992.
- Thornley, J. H. M. and Verberne, E. L. J.: A model of nitrogen flows in grassland, *Plant Cell Environ*, 12, 863–886, <https://doi.org/10.1111/j.1365-3040.1989.tb01967.x>, 1989.
- Vira, J., Hess, P., Melkonian, J., and Wieder, W. R.: An improved mechanistic model for ammonia volatilization in Earth  
265 system models: Flow of Agricultural Nitrogen version 2 (FANv2), *Geosci. Model Dev.*, 13, 4459–4490, <https://doi.org/10.5194/gmd-13-4459-2020>, 2020.
- Wieder, W. R., Boehnert, J., and Bonan, G. B.: Evaluating soil biogeochemistry parameterizations in Earth system models with observations: Soil Biogeochemistry in ESMs, *Global Biogeochem. Cycles*, 28, 211–222, <https://doi.org/10.1002/2013GB004665>, 2014.

270
